# Supplementary material for: Association between body mass index and suicidal behaviors: a systematic review protocol
Source: Springer Nature journal article supplement (doi:10.1186/s13643-015-0038-y), 2015-04-18
Supplement: MOESM1 [file 9787416]

**DATA EXTRACTION FORM: ASSOCIATION BETWEEN BODY MASS INDEX AND  
SUICIDAL BEHAVIOUR: A SYSTEMATIC REVIEW.**

**STUDY DETAILS**

Study ID: \_\_\_\_\_

Reviewer Initials: \_\_\_\_\_

Last Name of First Author, Initial: \_\_\_\_\_

Year of Publication: \_\_\_\_\_

Title of Article: \_\_\_\_\_

Journal Name: \_\_\_\_\_

City, Country: \_\_\_\_\_

**METHODS**

Study Setting: \_\_\_\_\_

Study Design: \_\_\_\_\_

Sample Size: Total \_\_\_\_\_, Men \_\_\_\_\_, Women \_\_\_\_\_

Mean Age (SD): Total \_\_\_\_\_, Men \_\_\_\_\_, Women \_\_\_\_\_

Ethnicity: \_\_\_\_\_

**RESULTS**

Suicide Behaviour Outcome (completed suicide, attempted suicide, suicide ideation, other):

\_\_\_\_\_

Outcome Definition:

\_\_\_\_\_

Outcome Measurement/Assessment:

\_\_\_\_\_

Number of Individuals Experiencing the event: Completed suicide \_\_\_\_\_,  
Attempted Suicide \_\_\_\_\_

Suicide Ideation \_\_\_\_\_, Other \_\_\_\_\_, N/A \_\_\_\_\_,

Statistical Testing/Methods: \_\_\_\_\_

Adjusted For:

\_\_\_\_\_

Statistical Results: Coefficient \_\_\_\_\_, 95% CI \_\_\_\_\_, p-value \_\_\_\_\_

Main/Additional Findings:

\_\_\_\_\_

Study Limitations:

\_\_\_\_\_

**Inclusion Criteria (all criteria must be checked to be included):**

The study examines the association between body mass index (BMI) and risk of suicidal behaviours

Study participants are  $\geq 18$  years of age

Study participants are human

Study has been completed and published

**Exclusion Criteria (study will be excluded if any of the following are present):**

Includes children and adolescents

Reports the association between risk of suicide and BMI following medical or pharmacological treatment of obesity (e.g. bariatric surgery).

Animal Study

Incomplete Study

Abstract, commentary, review

**Comments:**

---

---
