# Supplementary material for: Association between body mass index and suicidal behaviors: a systematic review protocol
Source: Springer Nature journal article supplement (doi:10.1186/s13643-015-0038-y), 2015-04-18
Supplement: MOESM2 [file 9787416]

Adapted version of a modified Newcastle-Ottawa Scale for a single use in a specific context

### Modified Newcastle-Ottawa Scale

#### Legend

|                                      |
|--------------------------------------|
| 0= Definitely No (high risk of bias) |
| 1= Mostly No                         |
| 2= Mostly Yes                        |
| 3= Definitely Yes (low risk of bias) |

**Domain of evaluation:** Methods for selecting study participants (*i.e. Selection Bias*)

**Is the source population (cases, controls, cohorts) appropriate and representative of the population of interest?**

0 (high risk of bias)                      1                      2                      3 (low risk of bias)

Example of low risk of bias: A consecutive sample or random selection from a population that is representative of the condition under study.

Example of moderate risk of bias: A consecutive sample or random selection from a population that is not highly representative of the outcome of interest.

Example of high risk of bias: The source population cannot be defined or enumerated (*i.e.* volunteering or self-recruitment).

**Domain of evaluation:** Methods to control for confounding (*i.e. Performance Bias*)

**Is the sample size sufficient and is there sufficient power to detect a meaningful difference in the outcome of interest?**

0 (high risk of bias)                      1                      2                      3 (low risk of bias)

Example of low risk of bias: Sample size was adequate and there was sufficient power to detect a difference in the outcome.

Example of high risk of bias: Sample size was small and there was not enough power to test the outcome of interest.

**Did the study adjust for any variables or confounders that may influence the outcome?**

0 1 2 3  
(high risk of bias) (low risk of bias)

Example of low risk of bias: The study identified and adjusted for all possible confounders that may influence the estimates of association between exposure and outcome.

Examples of moderate risk bias: The study identified and reported possible variables that may influence the outcome but did not statistically explore their influence.

Example of high risk of bias: The study either did not report any variables of influence or acknowledge any variables of influence when it was clear they were present.

Domain of evaluation: Statistical methods (i.e. Detection Bias)

**Did the study use appropriate statistical analysis methods relative to the outcome of interest?**

0 1 2 3  
(high risk of bias) (low risk of bias)

Example of low risk of bias: The study reported use of appropriate statistical analysis as required.

Examples of moderate risk bias: The study used either correct statistical methods but did not report them well, or used the incorrect methods but reported them in detail.

Example of high risk of bias: The study did not use appropriate statistical analysis as required.

**Is there little missing data and did the study handle it accordingly?**

0 1 2 3  
(high risk of bias) (low risk of bias)

Example of low risk of bias: The study acknowledged missing data to be less than 10% and specified the method of handling it.

Examples of moderate risk bias: The study either had greater than 15% of missing data but they specified the method used to handle it.

Example of high risk of bias: The study had greater than 15% of missing data and did not handle it at all.

Domain of evaluation: Methods of measuring outcome variables (i.e. Information bias)

**Is the methodology of the outcome measurement explicitly stated and is it appropriate?**

0 1 2 3  
(high risk of bias) (low risk of bias)

Example of low risk of bias: The study provides a detailed description of the outcome measure(s) which are appropriate for the outcome of interest.

Examples of moderate risk bias: The study provides a somewhat complete description of outcome measurements that are justified.

Example of high risk of bias: The study provides limited information on the methods of measuring the outcome and the measure is not appropriate considering the outcome.

**Is there an objective assessment of the outcome of interest?**

Example of low risk of bias: The study used objective methods to discern the outcome status of participants (*i.e. laboratory measurements, medical records*)

Examples of moderate risk bias: The study relied on subjective data as the primary method to discern the outcome status of participants (*i.e. self-report*)

Example of high risk of bias: The study had limited reporting about assessment of outcomes.

Domain of evaluation: Subject Follow-up

**Was the follow-up sufficiently long enough for the outcome to occur?**

0 1 2 3  
(high risk of bias) (low risk of bias)

**Was there minimal loss to follow-up and are subjects lost to follow-up unlikely to introduce bias?**

0 1 2 3  
(high risk of bias) (low risk of bias)

Example of low risk of bias: Follow-up was completed for all, or nearly all subjects, and reasons for losses to follow-up were well documented.

Example of moderate risk of bias: Losses to follow-up are not excessive, and reasons for

losses to follow-up are well documented and mostly unrelated to the outcome.

Example of high risk of bias: Significant loss to follow-up, reasons for losses to follow-up not reported, suspect that reasons for dropouts are related to the outcome.
